# Supplementary material for: Presence of Group A streptococcus frequently assayed virulence genes in invasive disease: a systematic review and meta-analysis
Source: PubMed Central journal article supplement (PMC11270091; doi:10.3389/fcimb.2024.1337861), 2024-06-03
Supplement: DataSheet_1.pdf [file DataSheet_1.pdf]

## **Supplementary data**

**Fig S1. The most prevalent emm types identified amongst GAS studies.**

**Table S1. Search strategy for PubMed database.**

**Table S2. Characteristics of excluded studies.**

**Table S3. Risk of bias of the included studies.**

**Table S4. List of emm types significantly associated with invasive GAS infection.**

**Table S5. Study data of all virulence factors in all the studies (classification-cell surface, secretory, both or other).**

**Table S6. Meta-analyses of the association of secretory virulence factors and invasive infection (lab method: PCR; Low ROB).**

**Table S7. Distribution of emm cluster in invasive GAS infections.**

**Table S8. Extract of the more significant emm clusters associated with the significant virulence factors.**

**Table S9. Summary of emm clusters (>2 studies) associated with the significant virulence factors.**

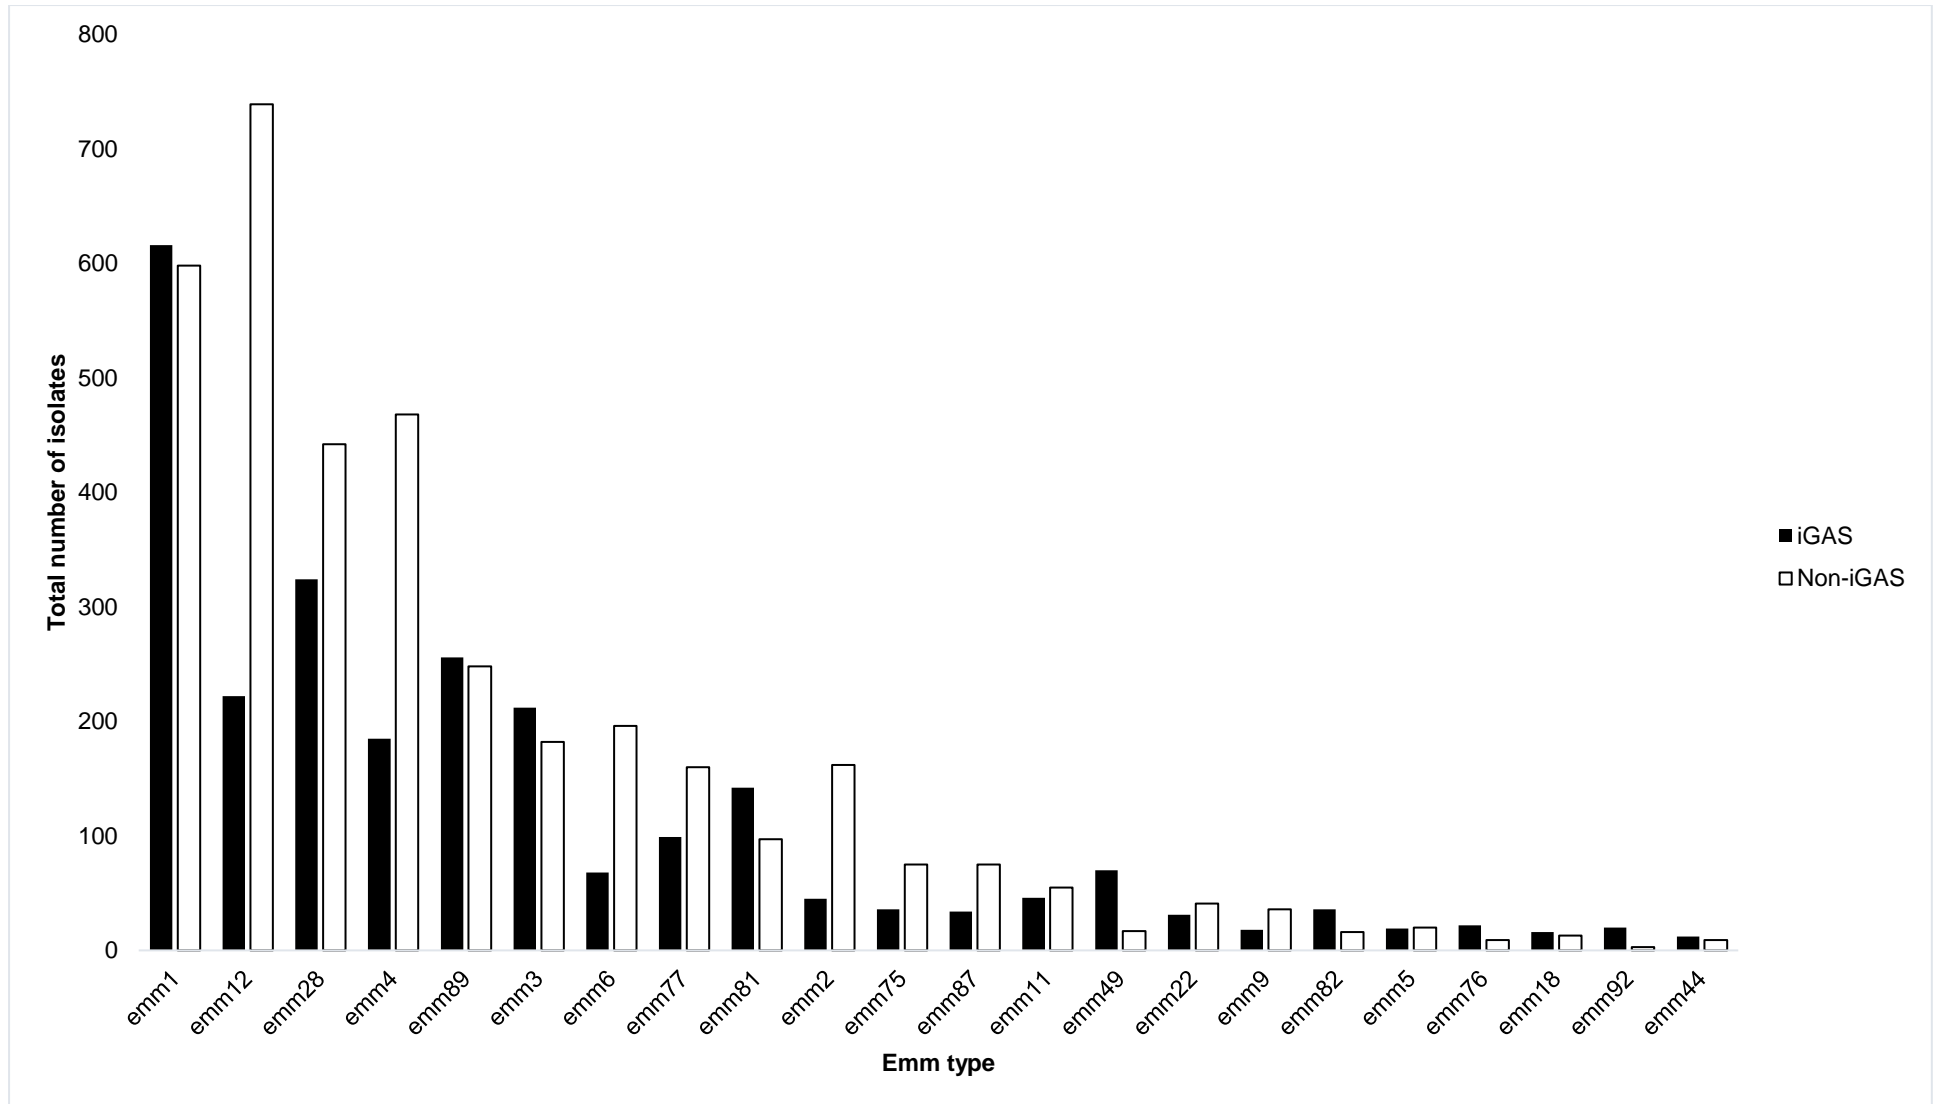

**Fig S1. The most prevalent emm types identified amongst GAS studies.**

**Table S1. Search strategy for PubMed database.**

| Search number | Search Details                                                                                                                                                                                                                                                                                                                                                                                                                                                                                                                                                                                                                                                                                                                                                                                                                                                                                                                                                                                                                                                                                                                                                                                                                                                                                                                                                                                                                                                                                                                                                                                                                                                                                                                                                                                                                                                                                                                                                                                                                                                                                                                                                                                                                                                                                                                                                                                                                                                                                                                                                                                                                                                                                                                                                                                                                                                                                                                                  |
|---------------|-------------------------------------------------------------------------------------------------------------------------------------------------------------------------------------------------------------------------------------------------------------------------------------------------------------------------------------------------------------------------------------------------------------------------------------------------------------------------------------------------------------------------------------------------------------------------------------------------------------------------------------------------------------------------------------------------------------------------------------------------------------------------------------------------------------------------------------------------------------------------------------------------------------------------------------------------------------------------------------------------------------------------------------------------------------------------------------------------------------------------------------------------------------------------------------------------------------------------------------------------------------------------------------------------------------------------------------------------------------------------------------------------------------------------------------------------------------------------------------------------------------------------------------------------------------------------------------------------------------------------------------------------------------------------------------------------------------------------------------------------------------------------------------------------------------------------------------------------------------------------------------------------------------------------------------------------------------------------------------------------------------------------------------------------------------------------------------------------------------------------------------------------------------------------------------------------------------------------------------------------------------------------------------------------------------------------------------------------------------------------------------------------------------------------------------------------------------------------------------------------------------------------------------------------------------------------------------------------------------------------------------------------------------------------------------------------------------------------------------------------------------------------------------------------------------------------------------------------------------------------------------------------------------------------------------------------|
| 5             | #3 AND #4                                                                                                                                                                                                                                                                                                                                                                                                                                                                                                                                                                                                                                                                                                                                                                                                                                                                                                                                                                                                                                                                                                                                                                                                                                                                                                                                                                                                                                                                                                                                                                                                                                                                                                                                                                                                                                                                                                                                                                                                                                                                                                                                                                                                                                                                                                                                                                                                                                                                                                                                                                                                                                                                                                                                                                                                                                                                                                                                       |
| 4             | "Invasive GAS"[All Fields] OR "iGAS"[All Fields] OR "sepsis"[All Fields] OR "septicaemia"[All Fields] OR "Streptococcal toxic shock syndrome"[All Fields] OR "Necrotizing fasciitis"[All Fields] OR (("streptococcal infections"[MeSH Terms] OR ("streptococcal"[All Fields] AND "infections"[All Fields]) OR "streptococcal infections"[All Fields] OR "strep"[All Fields]) AND ("bacteraemia"[All Fields] OR "bacteremia"[MeSH Terms] OR "bacteremia"[All Fields] OR "bacteraemias"[All Fields] OR "bacteremias"[All Fields]) OR ("gas"[All Fields] AND ("blood"[MeSH Subheading] OR "blood"[All Fields] OR "blood"[MeSH Terms] OR "bloods"[All Fields] OR "haematology"[All Fields] OR "hematology"[MeSH Terms] OR "hematology"[All Fields] OR "haematoma"[All Fields] OR "hematoma"[MeSH Terms] OR "hematoma"[All Fields] OR "haemorrhage"[All Fields] OR "hemorrhage"[MeSH Terms] OR "hemorrhage"[All Fields] OR "haemorrhages"[All Fields] OR "hemorrhages"[All Fields] OR "haemorrhagic"[All Fields] OR "haemorrhaging"[All Fields] OR "hematologies"[All Fields] OR "haematomas"[All Fields] OR "hematomas"[All Fields] OR "hematoma s"[All Fields] OR "hematomae"[All Fields] OR "hemorrhaged"[All Fields] OR "hemorrhagic"[All Fields] OR "hemorrhagical"[All Fields] OR "hemorrhaging"[All Fields]) AND ("infect"[All Fields] OR "infectability"[All Fields] OR "infectable"[All Fields] OR "infectant"[All Fields] OR "infectants"[All Fields] OR "infected"[All Fields] OR "infecteds"[All Fields] OR "infectibility"[All Fields] OR "infectible"[All Fields] OR "infecting"[All Fields] OR "infection s"[All Fields] OR "infections"[MeSH Terms] OR "infections"[All Fields] OR "infection"[All Fields] OR "infective"[All Fields] OR "infectiveness"[All Fields] OR "infectives"[All Fields] OR "infectivities"[All Fields] OR "infects"[All Fields] OR "pathogenicity"[MeSH Subheading] OR "pathogenicity"[All Fields] OR "infectivity"[All Fields]) OR (group a[Author] AND ("streptococcus"[MeSH Terms] OR "streptococcus"[All Fields] OR "streptococcal"[All Fields]) AND ("postpartum period"[MeSH Terms] OR ("postpartum period"[MeSH Terms] OR ("postpartum"[All Fields] AND "period"[All Fields]) OR "postpartum period"[All Fields] OR "postpartum"[All Fields]) AND ("infect"[All Fields] OR "infectability"[All Fields] OR "infectable"[All Fields] OR "infectant"[All Fields] OR "infectants"[All Fields] OR "infected"[All Fields] OR "infecteds"[All Fields] OR "infectibility"[All Fields] OR "infectible"[All Fields] OR "infecting"[All Fields] OR "infection s"[All Fields] OR "infections"[MeSH Terms] OR "infections"[All Fields] OR "infection"[All Fields] OR "infective"[All Fields] OR "infectiveness"[All Fields] OR "infectives"[All Fields] OR "infectivities"[All Fields] OR "infects"[All Fields] OR "pathogenicity"[MeSH Subheading] OR "pathogenicity"[All Fields] OR "infectivity"[All Fields])) |
| 3             | #1 AND #2                                                                                                                                                                                                                                                                                                                                                                                                                                                                                                                                                                                                                                                                                                                                                                                                                                                                                                                                                                                                                                                                                                                                                                                                                                                                                                                                                                                                                                                                                                                                                                                                                                                                                                                                                                                                                                                                                                                                                                                                                                                                                                                                                                                                                                                                                                                                                                                                                                                                                                                                                                                                                                                                                                                                                                                                                                                                                                                                       |
| 2             | "Genetic elements"[All Fields] OR "superantigen*"[All Fields] OR "prophage*"[All Fields] OR "virulence factors"[All Fields] OR "virulent factors"[All Fields] OR "genome components"[All Fields]                                                                                                                                                                                                                                                                                                                                                                                                                                                                                                                                                                                                                                                                                                                                                                                                                                                                                                                                                                                                                                                                                                                                                                                                                                                                                                                                                                                                                                                                                                                                                                                                                                                                                                                                                                                                                                                                                                                                                                                                                                                                                                                                                                                                                                                                                                                                                                                                                                                                                                                                                                                                                                                                                                                                                |
| 1             | "Streptococcus pyogenes"[All Fields] OR "Group A Streptococcus"[All Fields] OR "GAS"[All Fields] OR "Strep A"[All Fields]                                                                                                                                                                                                                                                                                                                                                                                                                                                                                                                                                                                                                                                                                                                                                                                                                                                                                                                                                                                                                                                                                                                                                                                                                                                                                                                                                                                                                                                                                                                                                                                                                                                                                                                                                                                                                                                                                                                                                                                                                                                                                                                                                                                                                                                                                                                                                                                                                                                                                                                                                                                                                                                                                                                                                                                                                       |

This search strategy was modified for Scopus and Web of Science databases.

**Table S2. Characteristics of excluded studies based on full-text.**

| Author         | Year | Title                                                                                                                                                                                | Reason                               |
|----------------|------|--------------------------------------------------------------------------------------------------------------------------------------------------------------------------------------|--------------------------------------|
| Nasser (1)     | 2014 | Evolutionary pathway to increased virulence and epidemic group A Streptococcus disease derived from 3,615 genome sequences                                                           | No comparison of iGAS/non-iGAS       |
| Meisal (2)     | 2009 | Molecular characteristics of pharyngeal and invasive emm3 Streptococcus pyogenes strains from Norway, 1988-2003                                                                      | No comparison of iGAS/non-iGAS       |
| Al-Shahib (3)  | 2016 | Emergence of a novel lineage containing a prophage in emm/M3 group A Streptococcus associated with upsurge in invasive disease in the UK                                             | No comparison of iGAS/non-iGAS       |
| Vlaminckx (4)  | 2007 | Dynamics in prophage content of invasive and non-invasive M1 and M28 Streptococcus pyogenes isolates in The Netherlands from 1959 to 1996                                            | No comparison of iGAS/non-iGAS       |
| Rogers (5)     | 2007 | Strain prevalence, rather than innate virulence potential, is the major factor responsible for an increase in serious group A streptococcus infections                               | No comparison of iGAS/non-iGAS       |
| Vikersfors (6) | 2009 | Severe group A streptococcal infections in Uppsala County, Sweden: clinical and molecular characterization of a case cluster from 2006 to 2007                                       | No comparison of iGAS/non-iGAS       |
| Akesson (7)    | 2004 | Low antibody levels against cell wall-attached proteins of Streptococcus pyogenes predispose for severe invasive disease                                                             | Proteomic study                      |
| Azuma (8)      | 2004 | Detection of circulating superantigens in an intensive care unit population                                                                                                          | Proteomic study                      |
| Basma (9)      | 1999 | Risk factors in the pathogenesis of invasive group A streptococcal infections: role of protective humoral immunity                                                                   | Proteomic study                      |
| Yang (10)      | 2006 | Variations in the protective immune response against streptococcal superantigens in populations of different ethnicity                                                               | Proteomic study                      |
| Arslan (11)    | 2013 | Distribution of emm genotypes and antibiotic susceptibility of Streptococcus pyogenes strains: analogy with the vaccine in development                                               | No virulence factors investigated    |
| Chalker (12)   | 2017 | Genome analysis following a national increase in Scarlet Fever in England 2014                                                                                                       | No virulence factors investigated    |
| Leung (13)     | 2018 | Group a streptococcus disease in hong kong children: An overview                                                                                                                     | No virulence factors investigated    |
| O'Brien (14)   | 1997 | The changing epidemiology of group A Streptococcus infections                                                                                                                        | No virulence factors investigated    |
| Parks (15)     | 2020 | Elevated risk of invasive group A streptococcal disease and host genetic variation in the human leucocyte antigen locus                                                              | No virulence factors investigated    |
| Sanson (16)    | 2019 | Unexpected relationships between frequency of antimicrobial resistance, disease phenotype and emm type in group A Streptococcus                                                      | No virulence factors investigated    |
| Kawabata (17)  | 2005 | Virulence factors in Streptococcus pyogenes infection                                                                                                                                | Full text not available              |
| Newton (18)    | 1997 | Novel superantigens from streptococcal toxic shock syndrome Streptococcus pyogenes isolates                                                                                          | Full text not available              |
| Brown (19)     | 2004 | The Molecular Basis of Streptococcal Toxic Shock Syndrome                                                                                                                            | Wrong publication type               |
| Cherneski (20) | 2001 | Necrotizing fasciitis                                                                                                                                                                | Wrong publication type               |
| Cole (21)      | 2010 | Molecular insight into invasive group A streptococcal disease                                                                                                                        | Wrong publication type               |
| Steer (22)     | 2012 | Invasive group a streptococcal disease: epidemiology, pathogenesis and management                                                                                                    | Wrong publication type               |
| Vlaminckx (23) | 2007 | Invasive Lancefield group A streptococcal infections in the Netherlands                                                                                                              | Wrong publication type               |
| Matsumoto (24) | 2016 | Description of the Pathogenic Features of Streptococcus pyogenes Isolates from Invasive and Non-Invasive Diseases in Aichi, Japan                                                    | Wrong publication type               |
| Cleary (25)    | 1992 | Clonal basis for resurgence of serious Streptococcus pyogenes disease in the 1980s                                                                                                   | RFLP Study                           |
| Friães (26)    | 2012 | Group A streptococci clones associated with invasive infections and pharyngitis in Portugal present differences in emm types, superantigen gene content and antimicrobial resistance | No breakdown of SAg in iGAS/non-iGAS |

| Author | Year | Title                                                                                                                                                                  | Reason                               |
|--------|------|------------------------------------------------------------------------------------------------------------------------------------------------------------------------|--------------------------------------|
| Bogiel | 2022 | Assessment of the Relationship between Clinical Manifestation and Pathogenic Potential of Streptococcus pyogenes Strains-Distribution of Genes and Genotypes of Toxins | No breakdown of SAg in iGAS/non-iGAS |

**Table S3. Risk of bias of the included studies.**

| Study ID           | RoB 1 | RoB 2 | RoB 3 | RoB 4 | RoB 5 | RoB 6 | ROB score | ROB      |
|--------------------|-------|-------|-------|-------|-------|-------|-----------|----------|
| Bencardino 2019    | 1     | 1     | 1     | 1     | 1     | 0     | 5         | Low      |
| Bianco 2006        | 1     | 1     | 1     | 1     | 1     | 0     | 5         | Low      |
| Chan 2009          | 1     | 0     | 1     | 1     | 1     | 1     | 5         | Low      |
| Coppens 2019       | 1     | 0     | 1     | 1     | 1     | 1     | 5         | Low      |
| Creti 2005         | 1     | 1     | 0     | 1     | 1     | 0     | 4         | Moderate |
| Darenberg 2007     | 1     | 0     | 1     | 1     | 1     | 0     | 4         | Moderate |
| Descheemaeker 2000 | 1     | 1     | 1     | 1     | 1     | 0     | 5         | Low      |
| DelVecchio 2002    | 1     | 1     | 1     | 1     | 1     | 0     | 5         | Low      |
| Ekelund 2005       | 1     | 1     | 1     | 1     | 1     | 1     | 6         | Low      |
| Golińska 2016      | 0     | 1     | 1     | 1     | 1     | 0     | 4         | Moderate |
| Haukness 2002      | 1     | 1     | 1     | 1     | 1     | 0     | 5         | Low      |
| Hraoui 2011        | 1     | 1     | 1     | 1     | 1     | 0     | 5         | Low      |
| Hsueh 1998         | 1     | 1     | 1     | 1     | 1     | 0     | 5         | Low      |
| Jing 2006          | 1     | 0     | 1     | 1     | 1     | 0     | 4         | Moderate |
| Khan 2020          | 1     | 0     | 0     | 1     | 1     | 0     | 3         | Moderate |
| Kittang 2011       | 1     | 1     | 1     | 1     | 1     | 1     | 6         | Low      |
| Li 2022            | 1     | 1     | 1     | 1     | 1     | 1     | 6         | Low      |
| Lintges 2010       | 1     | 0     | 1     | 1     | 1     | 0     | 4         | Moderate |
| Luca-Harari 2008   | 1     | 0     | 1     | 1     | 1     | 1     | 5         | Low      |
| Maripuu 2008       | 1     | 1     | 1     | 1     | 1     | 0     | 5         | Low      |
| Meehan 2018        | 1     | 0     | 1     | 1     | 1     | 0     | 4         | Moderate |
| Michaelsen 2011    | 1     | 1     | 1     | 1     | 1     | 0     | 5         | Low      |
| Muhtarova 2017     | 1     | U     | 1     | 1     | 1     | 0     | 4         | Moderate |
| Murakami 2002      | 1     | 1     | 1     | 1     | 1     | 0     | 5         | Low      |
| Mylvaganam 2000    | 1     | 1     | 1     | 1     | 1     | 0     | 5         | Low      |
| Nandi 2002         | 1     | 1     | 0     | 1     | 1     | 0     | 4         | Moderate |
| Plainvert 2014     | 1     | 1     | 1     | 1     | 1     | 0     | 5         | Low      |
| Rivera 2006        | 1     | 1     | 1     | 1     | 1     | 1     | 6         | Low      |
| Schmitz 2003       | 1     | 1     | 1     | 1     | 1     | 0     | 5         | Low      |
| Strus 2017         | 1     | 1     | 1     | 1     | 1     | 0     | 5         | Low      |
| Tyler 1992         | 1     | 1     | 0     | 1     | 1     | 1     | 5         | Low      |
| Yu 2021            | 1     | 1     | 0     | 1     | 1     | 1     | 5         | Low      |

1: study met the criteria; 0: the study did not meet the criteria; U: unclear.

ROB=Risk of bias; White=Low ROB; Grey=moderate ROB; Dark Grey=High ROB

Quality score: 1-2 high risk of bias; 3-4 moderate risk of bias; 5-6 low risk of bias

ROB Categories: 1-2, Representativeness of population; 3, Case definitions; 4, Study instrument reliability; 5, Data collection; 6, Limitations.

**Table S4. List of emm types significantly associated with invasive GAS infection.**

| emm type | Odds of association | 95% Confidence interval |
|----------|---------------------|-------------------------|
| emm1     | 1.63                | 1.44;1.84               |
| emm12    | 0.41                | 0.35;0.48               |
| emm3     | 2.15                | 1.75;2.64               |
| emm83    | 4.47                | 1.30;15.37              |
| emm4     | 0.61                | 0.51;0.73               |
| emm27    | 9.46                | 1.21;74.13              |
| emm76    | 3.33                | 1.53;7.26               |
| emm90    | 8.52                | 1.06;68.36              |
| emm92    | 6.41                | 1.90;21.67              |
| emm104   | 0.21                | 0.06;0.75               |
| emm49    | 6.25                | 3.66;10.67              |
| emm82    | 3.04                | 1.67;5.51               |
| emm2     | 0.48                | 0.34;0.66               |
| emm77    | 0.75                | 0.58;0.97               |
| emm89    | 1.60                | 1.33;1.92               |
| emm11    | 1.50                | 1.01;2.24               |
| emm81    | 1.46                | 1.12;1.90               |
| emm6     | 0.59                | 0.45;0.79               |

**Table S5. Study data of all virulence factors in all the studies (classification-cell surface, secretory, both or other).**

| Bacterium location | Virulence factor      | Studies (n) | GAS isolates (n) | GAS isolates (N) | iGAS (n) | non-iGAS (n) | Studies used (Reference No.)                            |
|--------------------|-----------------------|-------------|------------------|------------------|----------|--------------|---------------------------------------------------------|
| Cell surface       | <i>prtF1</i>          | 3           | 229              | 424              | 29/55    | 200/369      | (27-29)                                                 |
|                    | <i>prtF2</i>          | 1           | 73               | 122              | 0/5      | 73/117       | (27)                                                    |
|                    | <i>hasA</i>           | 1           | 388              | 653              | 163/236  | 225/417      | (30)                                                    |
|                    | <i>sda1</i>           | 1           | 130              | 653              | 36/236   | 94/417       | (30)                                                    |
|                    | <i>spy1325</i>        | 1           | 34               | 67               | 13/30    | 21/37        | (31)                                                    |
|                    | <i>sla</i>            | 4           | 49               | 331              | 11/37    | 38/294       | (27, 31-33)                                             |
|                    | <i>srtB</i>           | 1           | 60               | 122              | 1/5      | 59/117       | (27)                                                    |
|                    | <i>cpa</i>            | 1           | 62               | 122              | 0/5      | 62/117       | (27)                                                    |
|                    | <i>bridge(region)</i> | 1           | 52               | 122              | 0/5      | 52/117       | (27)                                                    |
|                    | <i>fctA</i>           | 1           | 40               | 122              | 0/5      | 40/117       | (27)                                                    |
|                    | <i>fctB</i>           | 1           | 69               | 122              | 0/5      | 69/117       | (27)                                                    |
| Secretory          | <i>speA</i>           | 30          | 1629             | 4984             | 640/1543 | 989/3441     | (27-56)                                                 |
|                    | <i>speB</i>           | 18          | 2127             | 2138             | 569/574  | 1558/1564    | (27, 28, 31, 32, 34, 35, 38, 42, 44-47, 51-56)          |
|                    | <i>speC</i>           | 27          | 2745             | 4991             | 729/1605 | 2016/3386    | (27, 28, 30-34, 36-51, 54-57)                           |
|                    | <i>speF</i>           | 12          | 1674             | 1839             | 423/464  | 1251/1375    | (28, 29, 31, 34, 38, 42, 45-47, 53, 55, 56)             |
|                    | <i>speG</i>           | 15          | 2605             | 3340             | 972/1139 | 1633/2201    | (30, 31, 33, 35, 36, 39-43, 45, 46, 48, 56, 57)         |
|                    | <i>speH</i>           | 17          | 1022             | 3601             | 279/1191 | 743/2410     | (27, 28, 30, 31, 33, 36, 37, 39-43, 45, 46, 48, 56, 57) |
|                    | <i>speI</i>           | 13          | 823              | 2968             | 215/974  | 608/1994     | (27, 30, 31, 33, 37, 39-43, 45, 46, 57)                 |
|                    | <i>speJ</i>           | 14          | 1162             | 3024             | 461/1122 | 701/1902     | (30, 31, 33, 35, 36, 39-43, 45, 46, 56, 57)             |
|                    | <i>speK</i>           | 10          | 708              | 2703             | 215/869  | 493/1834     | (27, 30, 31, 33, 35, 40, 42, 45, 46, 57)                |
|                    | <i>speL</i>           | 11          | 438              | 2877             | 141/920  | 297/1957     | (27, 30, 31, 33, 40-43, 45, 46, 57)                     |
|                    | <i>speM</i>           | 12          | 503              | 2968             | 167/974  | 336/1994     | (27, 30, 31, 33, 39-43, 45, 46, 57)                     |
|                    | <i>ssa</i>            | 23          | 1588             | 4459             | 388/1413 | 1200/3046    | (27, 28, 30-34, 36-48, 52, 56, 57)                      |
|                    | <i>smeZ</i>           | 17          | 2685             | 3377             | 908/1187 | 1777/2190    | (27, 28, 30-36, 39, 40, 42, 43, 45, 46, 56, 57)         |
|                    | <i>sil</i>            | 2           | 205              | 659              | 152/445  | 53/214       | (32, 58)                                                |
|                    | <i>slo</i>            | 3           | 459              | 459              | 66/66    | 393/393      | (32, 42, 54)                                            |
|                    | <i>sof</i>            | 1           | 82               | 120              | 26/45    | 56/75        | (28)                                                    |
|                    | <i>NaDase 330G</i>    | 1           | 544              | 653              | 173/236  | 371/417      | (30)                                                    |



| Bacterium location | Virulence factor                                | Studies (n) | GAS isolates (n) | GAS isolates (N) | iGAS (n) | non-iGAS (n) | Studies used (Reference No.) |
|--------------------|-------------------------------------------------|-------------|------------------|------------------|----------|--------------|------------------------------|
|                    | <i>NaDase</i>                                   | 1           | 64               | 114              | 34/63    | 30/51        | (50)                         |
|                    | <i>sic</i>                                      | 1           | 113              | 653              | 24/236   | 89/471       | (30)                         |
|                    | <i>mac</i>                                      | 1           | 204              | 238              | 29/35    | 175/203      | (42)                         |
|                    | <i>per</i>                                      | 1           | 48               | 67               | 22/30    | 26/37        | (31)                         |
|                    | <i>Phage associated HNH homing endonuclease</i> | 1           | 21               | 25               | 19/23    | 2/2          | (35)                         |
|                    | <i>sdn</i>                                      | 1           | 35               | 122              | 1/5      | 34/117       | (27)                         |
|                    | <i>sipA2</i>                                    | 1           | 73               | 122              | 1/5      | 72/117       | (27)                         |
|                    | <i>mf</i>                                       | 1           | 316              | 316              | 17/17    | 299/299      | (48)                         |
| Both               | <i>spyCEP</i>                                   | 1           | 238              | 238              | 35/35    | 203/203      | (42)                         |
|                    | <i>sdaB</i>                                     | 1           | 238              | 238              | 35/35    | 203/203      | (42)                         |
|                    | <i>sdaD</i>                                     | 1           | 132              | 238              | 20/35    | 112/203      | (42)                         |
|                    | <i>sdc</i>                                      | 1           | 156              | 238              | 24/35    | 132/203      | (42)                         |
|                    | <i>spd3</i>                                     | 1           | 123              | 238              | 19/35    | 104/203      | (42)                         |
| Other              | <i>pnga3</i>                                    | 2           | 339              | 653              | 74/236   | 265/417      | (30)                         |
|                    | <i>srtC2</i>                                    | 1           | 67               | 122              | 0/5      | 67/117       | (27)                         |
|                    | <i>rofA</i>                                     | 1           | 98               | 122              | 5/5      | 93/117       | (27)                         |
|                    | <i>nra</i>                                      | 1           | 24               | 122              | 0/5      | 24/117       | (27)                         |

i-GAS= invasive GAS infections, non-iGAS= non-invasive GAS infections.

**Table S6. Meta-analyses of the association of virulence factors and invasive infection (lab method: PCR; Low ROB).**

| Virulence factor | Studies (n) | iGAS (n) | non-iGAS (n) | Pooled OR   | 95% CI    | Heterogeneity (I <sup>2</sup> ) (%) | Studies used (Reference No.)                     |
|------------------|-------------|----------|--------------|-------------|-----------|-------------------------------------|--------------------------------------------------|
| <i>speA</i>      | 20          | 420/950  | 799/2621     | <b>1.59</b> | 1.10;2.30 | 64.4                                | (27-29, 33, 34, 37, 39, 41, 43-48, 50-52, 54-56) |
| <i>speB</i>      | 4           | 268/280  | 583/632      | 0.60        | 0.11;3.26 | 57.4                                | (28, 45, 46, 56)                                 |
| <i>speC</i>      | 18          | 437/923  | 1479/2424    | 0.89        | 0.59;1.32 | 72.8                                | (27, 28, 33, 34, 37, 39, 43-48, 50, 51, 54-56)   |
| <i>speF</i>      | 4           | 236/256  | 373/390      | 0.97        | 0.42;2.22 | 0                                   | (34, 45, 55, 56)                                 |
| <i>speG</i>      | 7           | 298/323  | 847/1063     | 1.70        | 0.49;5.89 | 79.5                                | (33, 41, 43, 45, 46, 48, 56)                     |
| <i>speH</i>      | 11          | 127/629  | 529/1661     | 0.79        | 0.57;1.09 | 24.7                                | (27, 28, 33, 37, 39, 41, 43, 45, 46, 48, 56)     |
| <i>speI</i>      | 8           | 52/412   | 292/1245     | 0.86        | 0.59;1.25 | 3                                   | (27, 33, 37, 39, 41, 43, 45, 46)                 |
| <i>speJ</i>      | 7           | 156/360  | 274/801      | 0.87        | 0.52;1.46 | 57.4                                | (33, 39, 41, 43, 45, 46, 56)                     |
| <i>speK</i>      | 4           | 31/107   | 83/733       | <b>2.95</b> | 1.81;4.80 | 0                                   | (27, 33, 45, 46)                                 |
| <i>speL</i>      | 6           | 10/158   | 72/856       | 1.14        | 0.57;2.26 | 0                                   | (27, 33, 41, 43, 45, 46)                         |
| <i>speM</i>      | 7           | 45/212   | 116/893      | 1.52        | 0.88;2.64 | 34.1                                | (27, 33, 39, 41, 43, 45, 46)                     |
| <i>ssa</i>       | 14          | 226/778  | 796/2168     | 1.21        | 0.79;1.86 | 65.6                                | (27, 28, 33, 34, 37, 39, 41, 43-48, 56)          |
| <i>smeZ</i>      | 9           | 284/415  | 721/1013     | 1.21        | 0.58;2.54 | 61.4                                | (27, 28, 33, 34, 39, 43, 45, 46, 56)             |
| <i>prtF1</i>     | 3           | 29/55    | 200/369      | <b>0.42</b> | 0.20;0.87 | 0                                   | (27-29)                                          |

i-GAS= invasive GAS infections, non-iGAS= non-invasive GAS infections. OR= Odds Ratio; CI= Confidence interval; **Bold Typeface** = Significant association

**Table S7. Distribution of emm cluster in invasive GAS infections.**

| Emm cluster    | Emm type                                                                                                             | Total number of isolates for cluster | Cumulative % |
|----------------|----------------------------------------------------------------------------------------------------------------------|--------------------------------------|--------------|
| E4             | emm2, emm8, emm22, emm28, emm73, emm77, emm84, emm88, emm89, emm102, emm109, emm112, emm124                          | 783                                  | 28.0%        |
| AC3            | emm1                                                                                                                 | 616                                  | 50.0%        |
| E6             | emm11, emm42, emm59, emm63, emm65, emm67, emm75, emm81, emm85, emm94, emm158, emm172, emm182                         | 260                                  | 59.3%        |
| E3             | emm9, emm25, emm44, emm49, emm58, emm82, emm87, emm103, emm113, emm118, emm180, emm183                               | 202                                  | 66.5%        |
| E1             | emm4, emm60, emm78                                                                                                   | 204                                  | 73.8%        |
| AC4            | emm12, emm39                                                                                                         | 224                                  | 81.8%        |
| AC5            | emm3                                                                                                                 | 212                                  | 89.4%        |
| E2             | emm27, emm50, emm66, emm68, emm76, emm90, emm92, emm104, emm106, emm110, emm117, emm168                              | 89                                   | 92.6%        |
| M6             | emm6                                                                                                                 | 68                                   | 95.0%        |
| D4             | emm33, emm41, emm43, emm53, emm64, emm80, emm83, emm86, emm91, emm93, emm101, emm108, emm116, emm119, emm192, emm230 | 50                                   | 96.8%        |
| M5             | emm5                                                                                                                 | 19                                   | 97.5%        |
| M18            | emm18                                                                                                                | 16                                   | 98.1%        |
| D2             | emm32, emm71, emm100                                                                                                 | 10                                   | 98.4%        |
| M29            | emm29                                                                                                                | 9                                    | 98.7%        |
| No emm cluster | emm62, emm69, emm147, emm187, 27G, stns554, stG1750                                                                  | 13                                   | 99.2%        |
| M95            | emm95                                                                                                                | 4                                    | 99.4%        |
| M74            | emm74                                                                                                                | 3                                    | 99.5%        |
| D3             | emm217                                                                                                               | 2                                    | 99.5%        |
| M14            | emm14                                                                                                                | 2                                    | 99.6%        |
| M122           | emm122                                                                                                               | 2                                    | 99.7%        |
| M55            | emm55                                                                                                                | 2                                    | 99.7%        |
| AC1            | emm142                                                                                                               | 1                                    | 99.8%        |
| E5             | emm174                                                                                                               | 1                                    | 99.8%        |
| M236           | emm236                                                                                                               | 1                                    | 99.9%        |
| M17            | emm17                                                                                                                | 1                                    | 99.9%        |
| M23            | emm23                                                                                                                | 1                                    | 99.9%        |
| M24            | emm24                                                                                                                | 1                                    | 100.0%       |
| M179           | emm179                                                                                                               | 1                                    | 100.0%       |

**Table S8. Extract of the more significant emm clusters associated with the significant virulence factors.**

| Study ID         | Emm type | Emm cluster | Total GAS isolates (N) | Number of GAS isolates (n) |             |             |             |            |             |
|------------------|----------|-------------|------------------------|----------------------------|-------------|-------------|-------------|------------|-------------|
|                  |          |             |                        | <i>speA</i>                | <i>speG</i> | <i>speK</i> | <i>speM</i> | <i>ssa</i> | <i>smeZ</i> |
| Ekeland 2005     | emm1     | AC3         | 100                    | 82                         | N/A         | N/A         | N/A         | 11         | N/A         |
| Coppens 2019     | emm1     | AC3         | 25                     | 25                         | 25          | 3           | N/A         | N/A        | 25          |
| Darenberg 2007   | emm1     | AC3         | 146                    | 119                        | 146         | N/A         | N/A         | 7          | 145         |
| Jing 2006        | emm1     | AC3         | 25                     | 21                         | N/A         | N/A         | N/A         | 10         | 19          |
| Chan 2009        | emm1     | AC3         | 12                     | 12                         | N/A         | N/A         | N/A         | 2          | 12          |
| Luca-Harari 2008 | emm1     | AC3         | 37                     | 35                         | N/A         | N/A         | N/A         | 2          | 36          |
| Meehan 2018      | emm1     | AC3         | 188                    | 187                        | 184         | 4           | 0           | 1          | 188         |
| Maripuu 2008     | emm1     | AC3         | 45                     | 44                         | 45          | N/A         | 6           | 0          | 45          |
| Michaelsen 2011  | emm1     | AC3         | 22                     | 22                         | 22          | N/A         | 0           | 0          | N/A         |
| Rivera 2006      | emm1     | AC3         | 22                     | 22                         | 22          | N/A         | 0           | 0          | 12          |
| Bencardino 2019  | emm1     | AC3         | 18                     | 9                          | N/A         | 1           | 1           | 2          | 2           |
| Yu 2021          | emm1     | AC3         | 105                    | 93                         | 94          | 2           | 2           | 104        | 104         |
| Murakami 2002    | emm1     | AC3         | 42                     | 41                         | 34          | N/A         | N/A         | 14         | N/A         |
| Creti 2005       | emm1     | AC3         | 30                     | 27                         | N/A         | N/A         | N/A         | N/A        | N/A         |
| Haukness 2002    | emm1     | AC3         | 13                     | 13                         | N/A         | N/A         | N/A         | N/A        | N/A         |
| Schmitz 2003     | emm1     | AC3         | 72                     | 72                         | 72          | N/A         | N/A         | 2          | 66          |
| Kittang 2011     | emm1     | AC3         | 6                      | 6                          | 6           | 0           | 0           | 0          | 6           |
| Ekeland 2005     | emm12    | AC4         | 69                     | 8                          | N/A         | N/A         | N/A         | 13         | N/A         |
| Darenberg 2007   | emm12    | AC4         | 157                    | 9                          | 157         | N/A         | N/A         | 5          | 157         |
| Jing 2006        | emm12    | AC4         | 20                     | 7                          | N/A         | N/A         | N/A         | 8          | 17          |
| Chan 2009        | emm12    | AC4         | 5                      | 0                          | N/A         | N/A         | N/A         | 3          | 5           |
| Luca-Harari 2008 | emm12    | AC4         | 26                     | 0                          | N/A         | N/A         | N/A         | 0          | 25          |
| Meehan 2018      | emm12    | AC4         | 92                     | 8                          | 86          | 1           | 1           | 23         | 90          |
| Maripuu 2008     | emm12    | AC4         | 4                      | 0                          | 4           | N/A         | 0           | 0          | 4           |
| Michaelsen 2011  | emm12    | AC4         | 3                      | 0                          | 3           | N/A         | 0           | 0          | N/A         |
| Rivera 2006      | emm12    | AC4         | 9                      | 0                          | 9           | N/A         | 0           | 1          | 9           |
| Bencardino 2019  | emm12    | AC4         | 11                     | 0                          | N/A         | 4           | 2           | 1          | 1           |
| Yu 2021          | emm12    | AC4         | 201                    | 5                          | 176         | 3           | 2           | 198        | 199         |
| Murakami 2002    | emm12    | AC4         | 55                     | 33                         | 51          | N/A         | N/A         | 17         | N/A         |

| Study ID         | Emm type | Emm cluster | Total GAS isolates (N) | Number of GAS isolates (n) |             |             |             |            |             |
|------------------|----------|-------------|------------------------|----------------------------|-------------|-------------|-------------|------------|-------------|
|                  |          |             |                        | <i>speA</i>                | <i>speG</i> | <i>speK</i> | <i>speM</i> | <i>ssa</i> | <i>smeZ</i> |
| Creti 2005       | emm12    | AC4         | 38                     | 4                          | N/A         | N/A         | N/A         | N/A        | N/A         |
| Haukness 2002    | emm12    | AC4         | 12                     | 6                          | N/A         | N/A         | N/A         | N/A        | N/A         |
| Schmitz 2003     | emm12    | AC4         | 23                     | 4                          | 21          | N/A         | N/A         | 2          | 0           |
| Kittang 2011     | emm12    | AC4         | 22                     | 0                          | 22          | 0           | 0           | 4          | 22          |
| Jing 2006        | emm3     | AC5         | 2                      | 2                          | N/A         | N/A         | N/A         | 2          | 0           |
| Luca-Harari 2008 | emm3     | AC5         | 2                      | 2                          | N/A         | N/A         | N/A         | 1          | 1           |
| Meehan 2018      | emm3     | AC5         | 148                    | 138                        | 147         | 64          | 2           | 100        | 146         |
| Maripuu 2008     | emm3     | AC5         | 1                      | 1                          | 1           | N/A         | 0           | 1          | 0           |
| Michaelsen 2011  | emm3     | AC5         | 11                     | 11                         | 11          | N/A         | 11          | 10         | N/A         |
| Rivera 2006      | emm3     | AC5         | 11                     | 11                         | 11          | N/A         | 11          | 11         | 7           |
| Yu 2021          | emm3     | AC5         | 2                      | 2                          | 0           | 2           | 2           | 0          | 2           |
| Murakami 2002    | emm3     | AC5         | 11                     | 11                         | 6           | N/A         | N/A         | 11         | N/A         |
| Creti 2005       | emm3     | AC5         | 14                     | 12                         | N/A         | N/A         | N/A         | N/A        | N/A         |
| Haukness 2002    | emm3     | AC5         | 8                      | 8                          | N/A         | N/A         | N/A         | N/A        | N/A         |
| Schmitz 2003     | emm3     | AC5         | 51                     | 51                         | 51          | N/A         | N/A         | 45         | 1           |
| Kittang 2011     | emm3     | AC5         | 11                     | 11                         | 11          | 11          | 0           | 11         | 11          |
| Maripuu 2008     | emm36    | D1          | 1                      | 0                          | 1           | N/A         | 0           | 1          | 1           |
| Luca-Harari 2008 | emm100   | D2          | 1                      | 0                          | N/A         | N/A         | N/A         | 1          | 1           |
| Maripuu 2008     | emm100   | D2          | 1                      | 0                          | 1           | N/A         | 1           | 0          | 1           |
| Jing 2006        | emm64    | D4          | 1                      | 0                          | N/A         | N/A         | N/A         | 0          | 1           |
| Jing 2006        | emm80    | D4          | 4                      | 4                          | N/A         | N/A         | N/A         | 0          | 4           |
| Jing 2006        | emm86    | D4          | 1                      | 0                          | N/A         | N/A         | N/A         | 0          | 1           |
| Jing 2006        | emm101   | D4          | 3                      | 1                          | N/A         | N/A         | N/A         | 0          | 3           |
| Luca-Harari 2008 | emm33    | D4          | 1                      | 0                          | N/A         | N/A         | N/A         | 1          | 1           |
| Luca-Harari 2008 | emm64    | D4          | 1                      | 0                          | N/A         | N/A         | N/A         | 0          | 1           |
| Luca-Harari 2008 | emm91    | D4          | 1                      | 0                          | N/A         | N/A         | N/A         | 0          | 1           |
| Luca-Harari 2008 | emm119   | D4          | 1                      | 0                          | N/A         | N/A         | N/A         | 0          | 1           |
| Maripuu 2008     | emm41.2  | D4          | 1                      | 0                          | 1           | N/A         | 0           | 0          | 1           |
| Maripuu 2008     | emm91    | D4          | 1                      | 0                          | 1           | N/A         | 0           | 0          | 1           |

| Study ID         | Emm type | Emm cluster | Total GAS isolates (N) | Number of GAS isolates (n) |             |             |             |            |             |
|------------------|----------|-------------|------------------------|----------------------------|-------------|-------------|-------------|------------|-------------|
|                  |          |             |                        | <i>speA</i>                | <i>speG</i> | <i>speK</i> | <i>speM</i> | <i>ssa</i> | <i>smeZ</i> |
| Maripuu 2008     | emm93    | D4          | 1                      | 0                          | 1           | N/A         | 0           | 0          | 1           |
| Rivera 2006      | emm43.5  | D4          | 1                      | 0                          | 1           | N/A         | 0           | 0          | 1           |
| Rivera 2006      | emm64    | D4          | 2                      | 0                          | 2           | N/A         | 2           | 0          | 1           |
| Rivera 2006      | emm70    | D4          | 1                      | 0                          | 1           | N/A         | 1           | 0          | 1           |
| Rivera 2006      | emm83.4  | D4          | 1                      | 0                          | 1           | N/A         | 1           | 0          | 1           |
| Creti 2005       | emm80    | D4          | 1                      | 1                          | N/A         | N/A         | N/A         | N/A        | N/A         |
| Ekeland 2005     | emm4     | E1          | 66                     | 1                          | N/A         | N/A         | N/A         | 58         | N/A         |
| Darenberg 2007   | emm4     | E1          | 114                    | 0                          | 44          | N/A         | N/A         | 106        | 114         |
| Jing 2006        | emm4     | E1          | 2                      | 0                          | N/A         | N/A         | N/A         | 2          | 2           |
| Chan 2009        | emm4     | E1          | 2                      | 0                          | N/A         | N/A         | N/A         | 1          | 2           |
| Luca-Harari 2008 | emm4     | E1          | 3                      | 1                          | N/A         | N/A         | N/A         | 3          | 2           |
| Luca-Harari 2008 | emm78    | E1          | 3                      | 0                          | N/A         | N/A         | N/A         | 1          | 3           |
| Meehan 2018      | emm4     | E1          | 110                    | 2                          | 27          | 1           | 2           | 95         | 108         |
| Maripuu 2008     | emm4     | E1          | 2                      | 0                          | 2           | N/A         | 0           | 2          | 2           |
| Michaelsen 2011  | emm4     | E1          | 3                      | 0                          | 0           | N/A         | 0           | 3          | N/A         |
| Rivera 2006      | emm4     | E1          | 11                     | 1                          | 0           | N/A         | 0           | 10         | 6           |
| Bencardino 2019  | emm4     | E1          | 3                      | 3                          | N/A         | 0           | 2           | 10         | 8           |
| Yu 2021          | emm4.0   | E1          | 8                      | 2                          | 2           | 2           | 2           | 6          | 7           |
| Murakami 2002    | emm4     | E1          | 35                     | 11                         | 7           | N/A         | N/A         | 29         | N/A         |
| Haukness 2002    | emm4     | E1          | 7                      | 6                          | N/A         | N/A         | N/A         | N/A        | N/A         |
| Rivera 2006      | emm165   | E1          | 1                      | 0                          | 0           | N/A         | 0           | 0          | 1           |
| Kittang 2011     | emm4     | E1          | 9                      | 0                          | 1           | 0           | 0           | 8          | 9           |
| Jing 2006        | emm66    | E2          | 2                      | 0                          | N/A         | N/A         | N/A         | 0          | 2           |
| Luca-Harari 2008 | emm50/62 | E2          | 1                      | 0                          | N/A         | N/A         | N/A         | 0          | 1           |
| Luca-Harari 2008 | emm76    | E2          | 9                      | 0                          | N/A         | N/A         | N/A         | 0          | 9           |
| Luca-Harari 2008 | emm92    | E2          | 2                      | 0                          | N/A         | N/A         | N/A         | 2          | 2           |
| Luca-Harari 2008 | emm106   | E2          | 3                      | 0                          | N/A         | N/A         | N/A         | 2          | 2           |
| Meehan 2018      | emm90    | E2          | 4                      | 0                          | 4           | 0           | 1           | 0          | 4           |
| Maripuu 2008     | emm66    | E2          | 4                      | 0                          | 4           | N/A         | 1           | 0          | 4           |

| Study ID         | Emm type | Emm cluster | Total GAS isolates (N) | Number of GAS isolates (n) |             |             |             |            |             |
|------------------|----------|-------------|------------------------|----------------------------|-------------|-------------|-------------|------------|-------------|
|                  |          |             |                        | <i>speA</i>                | <i>speG</i> | <i>speK</i> | <i>speM</i> | <i>ssa</i> | <i>smeZ</i> |
| Maripuu 2008     | emm68    | E2          | 1                      | 0                          | 1           | N/A         | 0           | 0          | 4           |
| Rivera 2006      | emm50    | E2          | 3                      | 0                          | 3           | N/A         | 1           | 1          | 2           |
| Murakami 2002    | emm13    | E2          | 17                     | 14                         | 17          | N/A         | N/A         | 2          | N/A         |
| Jing 2006        | emm44    | E3          | 1                      | 1                          | N/A         | N/A         | N/A         | 0          | 0           |
| Luca-Harari 2008 | emm9     | E3          | 2                      | 0                          | N/A         | N/A         | N/A         | 0          | 2           |
| Luca-Harari 2008 | emm25    | E3          | 1                      | 0                          | N/A         | N/A         | N/A         | 0          | 1           |
| Luca-Harari 2008 | emm44/61 | E3          | 2                      | 0                          | N/A         | N/A         | N/A         | 0          | 2           |
| Luca-Harari 2008 | emm49    | E3          | 7                      | 6                          | N/A         | N/A         | N/A         | 0          | 2           |
| Luca-Harari 2008 | emm87    | E3          | 1                      | 1                          | N/A         | N/A         | N/A         | 1          | 0           |
| Meehan 2018      | emm9     | E3          | 1                      | 1                          | 0           | 0           | 0           | 1          | 0           |
| Meehan 2018      | emm87    | E3          | 16                     | 0                          | 16          | 0           | 2           | 14         | 16          |
| Maripuu 2008     | emm44    | E3          | 1                      | 0                          | 1           | N/A         | 0           | 0          | 0           |
| Maripuu 2008     | emm49    | E3          | 1                      | 0                          | 1           | N/A         | 0           | 0          | 0           |
| Maripuu 2008     | emm58    | E3          | 1                      | 0                          | 1           | N/A         | 0           | 0          | 1           |
| Maripuu 2008     | emm82    | E3          | 1                      | 0                          | 1           | N/A         | 0           | 0          | 1           |
| Rivera 2006      | emm9     | E3          | 4                      | 0                          | 4           | N/A         | 0           | 0          | 4           |
| Rivera 2006      | emm25.2  | E3          | 4                      | 0                          | 4           | N/A         | 0           | 4          | 3           |
| Rivera 2006      | emm44/61 | E3          | 2                      | 0                          | 2           | N/A         | 1           | 2          | 1           |
| Rivera 2006      | emm49.3  | E3          | 1                      | 1                          | 1           | N/A         | 0           | 0          | 1           |
| Rivera 2006      | emm58    | E3          | 2                      | 0                          | 2           | N/A         | 0           | 1          | 2           |
| Rivera 2006      | emm87    | E3          | 3                      | 0                          | 3           | N/A         | 0           | 3          | 2           |
| Murakami 2002    | emm58    | E3          | 11                     | 8                          | 10          | N/A         | N/A         | 0          | N/A         |
| Murakami 2002    | emm87    | E3          | 6                      | 3                          | 5           | N/A         | N/A         | 2          | N/A         |
| Creti 2005       | emm87    | E3          | 8                      | 1                          | N/A         | N/A         | N/A         | N/A        | N/A         |
| Kittang 2011     | emm82    | E3          | 7                      | 0                          | 7           | 0           | 0           | 0          | 7           |
| Kittang 2011     | emm87    | E3          | 14                     | 0                          | 14          | 0           | 0           | 13         | 13          |
| Ekeland 2005     | emm28    | E4          | 83                     | 12                         | N/A         | N/A         | N/A         | 12         | N/A         |
| Darenberg 2007   | emm28    | E4          | 229                    | 6                          | 228         | N/A         | N/A         | 6          | 228         |
| Darenberg 2007   | emm77    | E4          | 91                     | 0                          | 27          | N/A         | N/A         | 5          | 90          |

| Study ID         | Emm type | Emm cluster | Total GAS isolates (N) | Number of GAS isolates (n) |             |             |             |            |             |
|------------------|----------|-------------|------------------------|----------------------------|-------------|-------------|-------------|------------|-------------|
|                  |          |             |                        | <i>speA</i>                | <i>speG</i> | <i>speK</i> | <i>speM</i> | <i>ssa</i> | <i>smeZ</i> |
| Darenberg 2007   | emm89    | E4          | 179                    | 4                          | 177         | N/A         | N/A         | 1          | 176         |
| Jing 2006        | emm8     | E4          | 6                      | 0                          | N/A         | N/A         | N/A         | 0          | 6           |
| Jing 2006        | emm28    | E4          | 4                      | 1                          | N/A         | N/A         | N/A         | 1          | 3           |
| Jing 2006        | emm77    | E4          | 2                      | 1                          | N/A         | N/A         | N/A         | 0          | 2           |
| Jing 2006        | emm88    | E4          | 1                      | 0                          | N/A         | N/A         | N/A         | 0          | 1           |
| Chan 2009        | emm22    | E4          | 4                      | 0                          | N/A         | N/A         | N/A         | 4          | 4           |
| Chan 2009        | emm73    | E4          | 1                      | 0                          | N/A         | N/A         | N/A         | 0          | 1           |
| Chan 2009        | emm112   | E4          | 1                      | 0                          | N/A         | N/A         | N/A         | 0          | 1           |
| Luca-Harari 2008 | emm2     | E4          | 2                      | 0                          | N/A         | N/A         | N/A         | 0          | 1           |
| Luca-Harari 2008 | emm8     | E4          | 3                      | 0                          | N/A         | N/A         | N/A         | 0          | 3           |
| Luca-Harari 2008 | emm22    | E4          | 1                      | 0                          | N/A         | N/A         | N/A         | 1          | 1           |
| Luca-Harari 2008 | emm28    | E4          | 1                      | 1                          | N/A         | N/A         | N/A         | 1          | 1           |
| Luca-Harari 2008 | emm77    | E4          | 1                      | 0                          | N/A         | N/A         | N/A         | 0          | 1           |
| Luca-Harari 2008 | emm102   | E4          | 2                      | 0                          | N/A         | N/A         | N/A         | 0          | 1           |
| Meehan 2018      | emm2     | E4          | 2                      | 0                          | 0           | 0           | 0           | 0          | 1           |
| Meehan 2018      | emm22    | E4          | 38                     | 1                          | 35          | 29          | 2           | 1          | 16          |
| Meehan 2018      | emm28    | E4          | 106                    | 8                          | 105         | 40          | 0           | 3          | 105         |
| Meehan 2018      | emm77    | E4          | 13                     | 0                          | 7           | 0           | 4           | 0          | 13          |
| Meehan 2018      | emm89    | E4          | 84                     | 1                          | 77          | 4           | 0           | 3          | 83          |
| Maripuu 2008     | emm2     | E4          | 4                      | 1                          | 4           | N/A         | 1           | 0          | 2           |
| Maripuu 2008     | emm8     | E4          | 4                      | 0                          | 4           | N/A         | 4           | 0          | 4           |
| Maripuu 2008     | emm22    | E4          | 1                      | 0                          | 1           | N/A         | 0           | 0          | 1           |
| Maripuu 2008     | emm28    | E4          | 6                      | 0                          | 6           | N/A         | 0           | 0          | 6           |
| Maripuu 2008     | emm73    | E4          | 1                      | 1                          | 1           | N/A         | 0           | 0          | 1           |
| Maripuu 2008     | emm84    | E4          | 1                      | 0                          | 1           | N/A         | 0           | 0          | 0           |
| Maripuu 2008     | emm89    | E4          | 2                      | 0                          | 2           | N/A         | 0           | 0          | 2           |
| Michaelsen 2011  | emm28    | E4          | 1                      | 0                          | 1           | N/A         | 0           | 0          | N/A         |
| Rivera 2006      | emm2     | E4          | 4                      | 0                          | 4           | N/A         | 4           | 0          | 0           |
| Rivera 2006      | emm22    | E4          | 2                      | 0                          | 2           | N/A         | 1           | 2          | 2           |



| Study ID         | Emm type | Emm cluster | Total GAS isolates (N) | Number of GAS isolates (n) |             |             |             |            |             |
|------------------|----------|-------------|------------------------|----------------------------|-------------|-------------|-------------|------------|-------------|
|                  |          |             |                        | <i>speA</i>                | <i>speG</i> | <i>speK</i> | <i>speM</i> | <i>ssa</i> | <i>smeZ</i> |
| Rivera 2006      | emm28    | E4          | 9                      | 1                          | 9           | N/A         | 8           | 0          | 5           |
| Rivera 2006      | emm77    | E4          | 8                      | 0                          | 1           | N/A         | 0           | 1          | 8           |
| Rivera 2006      | emm89    | E4          | 5                      | 0                          | 5           | N/A         | 0           | 0          | 4           |
| Bencardino 2019  | emm89    | E4          | 3                      | 0                          | N/A         | 0           | 0           | 2          | 0           |
| Yu 2021          | emm2.0   | E4          | 3                      | 0                          | 3           | 2           | 2           | 1          | 1           |
| Yu 2021          | emm22.0  | E4          | 2                      | 1                          | 2           | 0           | 0           | 2          | 2           |
| Yu 2021          | emm28    | E4          | 1                      | 0                          | 1           | 0           | 0           | 0          | 1           |
| Yu 2021          | emm89.0  | E4          | 2                      | 0                          | 2           | 0           | 0           | 1          | 2           |
| Murakami 2002    | emm2     | E4          | 12                     | 3                          | 10          | N/A         | N/A         | 9          | N/A         |
| Murakami 2002    | emm28    | E4          | 53                     | 37                         | 48          | N/A         | N/A         | 17         | N/A         |
| Murakami 2002    | emm89    | E4          | 8                      | 5                          | 7           | N/A         | N/A         | 0          | N/A         |
| Creti 2005       | emm2     | E4          | 8                      | 5                          | N/A         | N/A         | N/A         | N/A        | N/A         |
| Creti 2005       | emm22    | E4          | 13                     | 1                          | N/A         | N/A         | N/A         | N/A        | N/A         |
| Haukness 2002    | emm2     | E4          | 5                      | 3                          | N/A         | N/A         | N/A         | N/A        | N/A         |
| Haukness 2002    | emm22    | E4          | 3                      | 2                          | N/A         | N/A         | N/A         | N/A        | N/A         |
| Haukness 2002    | emm28    | E4          | 5                      | 5                          | N/A         | N/A         | N/A         | N/A        | N/A         |
| Haukness 2002    | emm77    | E4          | 4                      | 4                          | N/A         | N/A         | N/A         | N/A        | N/A         |
| Haukness 2002    | emm89    | E4          | 5                      | 2                          | N/A         | N/A         | N/A         | N/A        | N/A         |
| Schmitz 2003     | emm28    | E4          | 32                     | 11                         | 31          | N/A         | N/A         | 1          | 1           |
| Kittang 2011     | emm28    | E4          | 27                     | 3                          | 27          | 14          | 0           | 0          | 27          |
| Kittang 2011     | emm89    | E4          | 8                      | 0                          | 8           | 0           | 0           | 0          | 8           |
| Darenberg 2007   | emm81    | E6          | 191                    | 2                          | 191         | N/A         | N/A         | 4          | 142         |
| Jing 2006        | emm63    | E6          | 1                      | 1                          | N/A         | N/A         | N/A         | 0          | 1           |
| Jing 2006        | emm75    | E6          | 1                      | 1                          | N/A         | N/A         | N/A         | 0          | 1           |
| Jing 2006        | emm94    | E6          | 2                      | 1                          | N/A         | N/A         | N/A         | 1          | 2           |
| Luca-Harari 2008 | emm65/69 | E6          | 3                      | 0                          | N/A         | N/A         | N/A         | 0          | 2           |
| Luca-Harari 2008 | emm75    | E6          | 7                      | 0                          | N/A         | N/A         | N/A         | 0          | 7           |
| Luca-Harari 2008 | emm81    | E6          | 10                     | 1                          | N/A         | N/A         | N/A         | 1          | 1           |
| Meehan 2018      | emm11    | E6          | 17                     | 0                          | 17          | 0           | 0           | 1          | 17          |

| Study ID         | Emm type | Emm cluster | Total GAS isolates (N) | Number of GAS isolates (n) |             |             |             |            |             |
|------------------|----------|-------------|------------------------|----------------------------|-------------|-------------|-------------|------------|-------------|
|                  |          |             |                        | <i>speA</i>                | <i>speG</i> | <i>speK</i> | <i>speM</i> | <i>ssa</i> | <i>smeZ</i> |
| Meehan 2018      | emm75    | E6          | 23                     | 2                          | 23          | 20          | 20          | 2          | 22          |
| Meehan 2018      | emm81    | E6          | 14                     | 0                          | 14          | 0           | 3           | 0          | 5           |
| Maripuu 2008     | emm75    | E6          | 2                      | 0                          | 2           | N/A         | 2           | 0          | 2           |
| Maripuu 2008     | emm81    | E6          | 1                      | 0                          | 1           | N/A         | 1           | 0          | 1           |
| Maripuu 2008     | emm85    | E6          | 1                      | 0                          | 1           | N/A         | 0           | 0          | 1           |
| Rivera 2006      | emm11    | E6          | 8                      | 0                          | 8           | N/A         | 0           | 0          | 5           |
| Rivera 2006      | emm59    | E6          | 2                      | 0                          | 2           | N/A         | 2           | 0          | 2           |
| Rivera 2006      | emm75    | E6          | 3                      | 0                          | 3           | N/A         | 3           | 0          | 3           |
| Rivera 2006      | emm81    | E6          | 1                      | 0                          | 1           | N/A         | 0           | 0          | 0           |
| Yu 2021          | emm75.0  | E6          | 4                      | 1                          | 4           | 3           | 3           | 1          | 4           |
| Murakami 2002    | emm11    | E6          | 11                     | 9                          | 11          | N/A         | N/A         | 2          | N/A         |
| Murakami 2002    | emm75    | E6          | 7                      | 5                          | 7           | N/A         | N/A         | 1          | N/A         |
| Haukness 2002    | emm75    | E6          | 2                      | 1                          | N/A         | N/A         | N/A         | N/A        | N/A         |
| Ekeland 2005     | emm6     | M6          | 57                     | 3                          | N/A         | N/A         | N/A         | 10         | N/A         |
| Jing 2006        | emm6     | M6          | 1                      | 1                          | N/A         | N/A         | N/A         | 1          | 0           |
| Jing 2006        | emm18    | M18         | 5                      | 3                          | N/A         | N/A         | N/A         | 1          | 5           |
| Jing 2006        | emm23    | M23         | 1                      | 0                          | N/A         | N/A         | N/A         | 1          | 1           |
| Luca-Harari 2008 | emm5     | M5          | 1                      | 0                          | N/A         | N/A         | N/A         | 0          | 1           |
| Luca-Harari 2008 | emm23    | M23         | 1                      | 1                          | N/A         | N/A         | N/A         | 1          | 1           |
| Luca-Harari 2008 | emm74    | M74         | 1                      | 0                          | N/A         | N/A         | N/A         | 0          | 1           |
| Meehan 2018      | emm5     | M5          | 6                      | 6                          | 6           | 0           | 0           | 0          | 5           |
| Maripuu 2008     | emm14    | M14         | 1                      | 1                          | 1           | N/A         | 0           | 1          | 1           |
| Maripuu 2008     | emm19    | M19         | 1                      | 0                          | 1           | N/A         | 0           | 0          | 1           |
| Rivera 2006      | emm18    | M18         | 1                      | 1                          | 1           | N/A         | 1           | 0          | 1           |
| Rivera 2006      | emm29.2  | M29         | 1                      | 0                          | 1           | N/A         | 1           | 0          | 1           |
| Bencardino 2019  | emm29    | M29         | 11                     | 0                          | N/A         | 0           | 4           | 1          | 3           |
| Murakami 2002    | emm18    | M18         | 8                      | 7                          | 4           | N/A         | N/A         | 2          | N/A         |
| Haukness 2002    | emm5     | M5          | 6                      | 3                          | N/A         | N/A         | N/A         | N/A        | N/A         |
| Haukness 2002    | emm18    | M18         | 5                      | 2                          | N/A         | N/A         | N/A         | N/A        | N/A         |

| Study ID         | Emm type | Emm cluster | Total GAS isolates (N) | Number of GAS isolates (n) |             |             |             |            |             |
|------------------|----------|-------------|------------------------|----------------------------|-------------|-------------|-------------|------------|-------------|
|                  |          |             |                        | <i>speA</i>                | <i>speG</i> | <i>speK</i> | <i>speM</i> | <i>ssa</i> | <i>smeZ</i> |
| Luca-Harari 2008 | emm95    | M95         | 6                      | 0                          | N/A         | N/A         | N/A         | 0          | 5           |
| Luca-Harari 2008 | emm6     | M6          | 3                      | 0                          | N/A         | N/A         | N/A         | 0          | 2           |
| Meehan 2018      | emm6     | M6          | 58                     | 9                          | 53          | 42          | 0           | 0          | 58          |
| Maripuu 2008     | emm6     | M6          | 1                      | 1                          | 1           | N/A         | 1           | 0          | 1           |
| Michaelsen 2011  | emm6     | M6          | 3                      | 3                          | 3           | N/A         | 3           | 0          | N/A         |
| Rivera 2006      | emm6     | M6          | 3                      | 3                          | 3           | N/A         | 3           | 0          | 3           |
| Bencardino 2019  | emm6     | M6          | 12                     | 3                          | N/A         | 7           | 0           | 0          | 4           |
| Yu 2021          | emm6     | M6          | 14                     | 12                         | 9           | 12          | 12          | 4          | 14          |
| Murakami 2002    | emm6     | M6          | 5                      | 4                          | 4           | N/A         | N/A         | 1          | N/A         |
| Haukness 2002    | emm6     | M6          | 6                      | 6                          | N/A         | N/A         | N/A         | N/A        | N/A         |

N/A= Not available

**Table S9. Summary of emm clusters (>2 studies) associated with the significant virulence factors.**

| Cluster | Emm type                                                                                            | No. of studies | No. of isolates | Percentage of virulence factors (%) |             |             |             |            |             |
|---------|-----------------------------------------------------------------------------------------------------|----------------|-----------------|-------------------------------------|-------------|-------------|-------------|------------|-------------|
|         |                                                                                                     |                |                 | <i>speA</i>                         | <i>speG</i> | <i>speK</i> | <i>SpeM</i> | <i>ssa</i> | <i>smeZ</i> |
| AC3     | emm1                                                                                                | 17             | 908             | 91                                  | 72          | 1           | 1           | 17         | 73          |
| AC4     | emm12                                                                                               | 16             | 747             | 11                                  | 71          | 1           | 1           | 37         | 71          |
| AC5     | emm3                                                                                                | 12             | 272             | 96                                  | 88          | 28          | 10          | 71         | 62          |
| D4      | emm33, emm41, emm43, emm53, emm64, emm70, emm80, emm83, emm86, emm91, emm93, emm101, emm119, emm223 | 5              | 22              | 27                                  | 36          | 0           | 18          | 5          | 91          |
| E1      | emm4, emm78, emm165                                                                                 | 14             | 379             | 7                                   | 22          | 1           | 2           | 88         | 70          |
| E2      | emm13, emm50, emm66, emm68, emm76, emm90, emm92, emm106                                             | 6              | 46              | 30                                  | 63          | 0           | 7           | 15         | 65          |
| E3      | emm9, emm25, emm44, emm49, emm58, emm82, emm87, emm183                                              | 8              | 97              | 23                                  | 74          | 0           | 3           | 42         | 60          |
| E4      | emm2, emm8, emm22, emm28, emm73, emm77, emm84, emm88, emm89, emm102, emm112                         | 16             | 1096            | 11                                  | 76          | 8           | 2           | 7          | 74          |
| E6      | emm11, emm59, emm63, emm65, emm75, emm81, emm85, emm94, emm177                                      | 9              | 311             | 8                                   | 92          | 7           | 11          | 4          | 70          |
| M6      | emm6                                                                                                | 11             | 163             | 28                                  | 45          | 37          | 12          | 10         | 50          |
| M18     | emm18                                                                                               | 4              | 19              | 68                                  | 26          | 0           | 5           | 16         | 32          |

*speM*- significant in high-quality studies any method.

*speG*, *smeZ*, *ssa*- significant in high-quality WGS studies.

*speA*, *speK*- significant in high-quality PCR studies.

## References

1. Nasser W, Beres SB, Olsen RJ, Dean MA, Rice KA, Long SW, et al. Evolutionary pathway to increased virulence and epidemic group A Streptococcus disease derived from 3,615 genome sequences. *Proceedings of the National Academy of Sciences*. 2014;111(17):E1768-E76.
2. Meisal R, Høiby E, Caugant D, Musser JM. Molecular characteristics of pharyngeal and invasive emm 3 Streptococcus pyogenes strains from Norway, 1988–2003. *European journal of clinical microbiology & infectious diseases*. 2010;29:31-43.
3. Al-Shahib A, Underwood A, Afshar B, Turner CE, Lamagni T, Srisikandan S, et al. Emergence of a novel lineage containing a prophage in emm/M3 group A Streptococcus associated with upsurge in invasive disease in the UK. *Microbial genomics*. 2016;2(6).
4. Vlamincx BJ, Schuren FH, Montijn RC, Caspers MP, Beitsma M, Wannet WJ, et al. Dynamics in prophage content of invasive and noninvasive M1 and M28 Streptococcus pyogenes isolates in The Netherlands from 1959 to 1996. *Infection and immunity*. 2007;75(7):3673-9.
5. Rogers S, Commons R, Danchin MH, Selvaraj G, Kelpie L, Curtis N, et al. Strain prevalence, rather than innate virulence potential, is the major factor responsible for an increase in serious group A streptococcus infections. *The Journal of infectious diseases*. 2007;195(11):1625-33.
6. Vikerfors A, Hagggar A, Darenberg J, Low A, Melhus Å, Hedlund J, et al. Severe group A streptococcal infections in Uppsala County, Sweden: clinical and molecular characterization of a case cluster from 2006 to 2007. *Scandinavian journal of infectious diseases*. 2009;41(11-12):823-30.
7. Åkesson P, Rasmussen M, Mascini E, Ulrich vP-R, Janulczyk R, Collin M, et al. Low antibody levels against cell wall-attached proteins of Streptococcus pyogenes predispose for severe invasive disease. *Journal of Infectious Diseases*. 2004;189(5):797-804.
8. Azuma K, Koike K, Kobayashi T, Mochizuki T, Mashiko K, Yamamoto Y. Detection of circulating superantigens in an intensive care unit population. *International journal of infectious diseases*. 2004;8(5):292-8.
9. Basma H, Norrby-Teglund A, Guedez Y, McGeer A, Low DE, El-Ahmedy O, et al. Risk factors in the pathogenesis of invasive group A streptococcal infections: role of protective humoral immunity. *Infection and immunity*. 1999;67(4):1871-7.
10. Yang LP, Eriksson BK, Harrington Z, Curtis N, Lang S, Currie BJ, et al. Variations in the protective immune response against streptococcal superantigens in populations of different ethnicity. *Medical microbiology and immunology*. 2006;195:37-43.
11. Arslan U, Oryaşın E, Eskin Z, Fındık D, Tuncer I, Bozdoğan B. Distribution of emm genotypes and antibiotic susceptibility of Streptococcus pyogenes strains: analogy with the vaccine in development. *Mikrobiyoloji Bulteni*. 2013;47(2):318-23.
12. Chalker V, Jironkin A, Coelho J, Al-Shahib A, Platt S, Kapatai G, et al. Genome analysis following a national increase in scarlet fever in England 2014. *BMC genomics*. 2017;18(1):1-10.
13. Leung TN, Hon K, Leung AK. Group A Streptococcus disease in Hong Kong children: an overview. *Hong Kong Medical Journal*. 2018.
14. O'Brien KL, Levine OS, Schwartz B, editors. *The changing epidemiology of group A Streptococcus infections*. *Seminars in Pediatric Infectious Diseases*; 1997: Elsevier.
15. Parks T, Elliott K, Lamagni T, Auckland K, Mentzer AJ, Guy R, et al. Elevated risk of invasive group A streptococcal disease and host genetic variation in the human leucocyte antigen locus. *Genes & Immunity*. 2020;21(1):63-70.
16. Sanson MA, Macias OR, Shah BJ, Hanson B, Vega LA, Alamarat Z, et al. Unexpected relationships between frequency of antimicrobial resistance, disease phenotype and emm type in group A Streptococcus. *Microbial Genomics*. 2019;5(11).

17. Kawabata S. Virulence factors in *Streptococcus pyogenes* infection. *Nihon Saikingaku zasshi Japanese Journal of Bacteriology*. 2005;60(2):365-74.
18. Newton D, Norrby-Teglund A, McGeer A, Low DE, Schlievert PM, Kotb M. Novel superantigens from streptococcal toxic shock syndrome *Streptococcus pyogenes* isolates. *Streptococci and the Host*. 1997:525-9.
19. Brown EJ. The molecular basis of streptococcal toxic shock syndrome. *New England Journal of Medicine*. 2004;350(20):2093-4.
20. Cherneski CL, Embil JM. Necrotizing fasciitis. *Saudi medical journal*. 2001;22(7):565-8.
21. Cole JN, Barnett TC, Nizet V, Walker MJ. Molecular insight into invasive group A streptococcal disease. *Nature Reviews Microbiology*. 2011;9(10):724-36.
22. Steer AC, Lamagni T, Curtis N, Carapetis JR. Invasive group a streptococcal disease: epidemiology, pathogenesis and management. *Drugs*. 2012;72:1213-27.
23. Vlamincx B, Mascini E, Schellekens J. Invasive Lancefield group A streptococcal infections in the Netherlands. *Nederlands Tijdschrift Voor Geneeskunde*. 2007;151(30):1669-73.
24. Matsumoto M, Yamada K, Suzuki M, Adachi H, Kobayashi S, Yamashita T, et al. Description of the pathogenic features of *Streptococcus pyogenes* isolates from invasive and non-invasive diseases in Aichi, Japan. *Japanese journal of infectious diseases*. 2016;69(4):338-41.
25. Cleary PP, Schlievert P, Handley JP, Kim M, Hauser A, Kaplan E, et al. Clonal basis for resurgence of serious *Streptococcus pyogenes* disease in the 1980s. *The Lancet*. 1992;339(8792):518-21.
26. Friães A, Pinto FR, Silva-Costa C, Ramirez M, Melo-Cristino J, Infections PGftSoS. Group A streptococci clones associated with invasive infections and pharyngitis in Portugal present differences in emm types, superantigen gene content and antimicrobial resistance. *BMC microbiology*. 2012;12(1):280.
27. Bencardino D, Di Luca MC, Petrelli D, Prenna M, Vitali LA. High virulence gene diversity in *Streptococcus pyogenes* isolated in Central Italy. *PeerJ*. 2019;7:e6613.
28. Luca-Harari B, Straut M, Cretoiu S, Surdeanu M, Ungureanu V, van der Linden M, et al. Molecular characterization of invasive and non-invasive *Streptococcus pyogenes* isolates from Romania. *Journal of medical microbiology*. 2008;57(11):1354-63.
29. Bianco S, Alice T, Zucca M, Savoia D. Survey of phenotypic and genetic features of *Streptococcus pyogenes* strains isolated in Northwest Italy. *Current microbiology*. 2006;52:33-9.
30. Li Y, Dominguez S, Nanduri SA, Rivers J, Mathis S, Li Z, et al. Genomic Characterization of Group A Streptococci Causing Pharyngitis and Invasive Disease in Colorado, USA, June 2016–April 2017. *The Journal of Infectious Diseases*. 2022;225(10):1841-51.
31. Golińska E, Van der Linden M, Więcek G, Mikołajczyk D, Machul A, Samet A, et al. Virulence factors of *Streptococcus pyogenes* strains from women in peri-labor with invasive infections. *European Journal of Clinical Microbiology & Infectious Diseases*. 2016;35(5):747-54.
32. Jing H-b, Ning B-a, Hao H-j, Zheng Y-l, Chang D, Jiang W, et al. Epidemiological analysis of group A streptococci recovered from patients in China. *Journal of medical microbiology*. 2006;55(8):1101-7.
33. Kittang BR, Skrede S, Langeland N, Haanshuus CG, Mylvaganam H. emm gene diversity, superantigen gene profiles and presence of SlaA among clinical isolates of group A, C and G streptococci from western Norway. *European journal of clinical microbiology & infectious diseases*. 2011;30:423-33.
34. Chan JC, Chu Y-W, Chu M-Y, Cheung TK, Lo JY. Epidemiological analysis of *Streptococcus pyogenes* infections in Hong Kong. *Pathology*. 2009;41(7):681-6.
35. Coppens J, Xavier BB, Loens K, Lammens C, Ieven M, Matheeußen V, et al. Remarkable genome stability among emm1 group a *Streptococcus* in Belgium over 19 Years. *Genome biology and evolution*. 2019;11(5):1432-9.

36. Darenberg J, Luca-Harari B, Jasir A, Sandgren A, Pettersson H, Schalén C, et al. Molecular and clinical characteristics of invasive group A streptococcal infection in Sweden. *Clinical infectious diseases*. 2007;45(4):450-8.
37. Ekelund K, Darenberg J, Norrby-Teglund A, Hoffmann S, Bang D, Skinhøj P, et al. Variations in emm type among group A streptococcal isolates causing invasive or noninvasive infections in a nationwide study. *Journal of clinical microbiology*. 2005;43(7):3101-9.
38. Khan RMA, Anwar S, Pirzada ZA. Streptococcus pyogenes strains associated with invasive and non-invasive infections present possible links with emm types and superantigens. *Iranian Journal of Basic Medical Sciences*. 2020;23(1):133.
39. Maripuu L, Eriksson A, Norgren M. Superantigen gene profile diversity among clinical group A streptococcal isolates. *FEMS Immunology & Medical Microbiology*. 2008;54(2):236-44.
40. Meehan M, Murchan S, Gavin PJ, Drew RJ, Cunney R. Epidemiology of an upsurge of invasive group A streptococcal infections in Ireland, 2012–2015. *Journal of Infection*. 2018;77(3):183-90.
41. Michaelsen T, Andreasson I, Langerud B, Caugant D. Similar Superantigen Gene Profiles and Superantigen Activity in Norwegian Isolates of Invasive and Non-Invasive Group A Streptococci. *Scandinavian journal of immunology*. 2011;74(5):423-9.
42. Muhtarova A, Gergova R, Setchanova L, Mitov I. Distribution of super-antigens and toxins in Bulgarian invasive and non-invasive clinical isolates Streptococcus pyogenes. *Acta Microb Bulgar*. 2017;33:151-6.
43. Rivera A, Rebollo M, Miro E, Mateo M, Navarro F, Gurguí M, et al. Superantigen gene profile, emm type and antibiotic resistance genes among group A streptococcal isolates from Barcelona, Spain. *Journal of medical microbiology*. 2006;55(8):1115-23.
44. Hraoui M, Boubaker IB-B, Doloy A, Samir E, Redjeb SB, Bouvet A. Epidemiological markers of Streptococcus pyogenes strains in Tunisia. *Clinical microbiology and infection*. 2011;17(1):63-8.
45. Yu D, Liang Y, Lu Q, Meng Q, Wang W, Huang L, et al. Molecular Characteristics of Streptococcus pyogenes Isolated From Chinese Children With Different Diseases. *Frontiers in Microbiology*. 2021;12:722225.
46. Strus M, Heczko P, Golińska E, Tomusiak A, Chmielarczyk A, Dorycka M, et al. The virulence factors of group A streptococcus strains isolated from invasive and non-invasive infections in Polish and German centres, 2009–2011. *European Journal of Clinical Microbiology & Infectious Diseases*. 2017;36(9):1643-9.
47. Descheemaeker P, Van Loock F, Hauchecorne M, Vandamme P, Goossens H. Molecular characterisation of group A streptococci from invasive and non-invasive disease episodes in Belgium during 1993–1994. *Journal of medical microbiology*. 2000;49(5):467-71.
48. Murakami J, Kawabata S, Terao Y, Kikuchi K, Totsuka K, Tamaru A, et al. Distribution of emm genotypes and superantigen genes of Streptococcus pyogenes isolated in Japan, 1994–9. *Epidemiology & Infection*. 2002;128(3):397-404.
49. Creti R, Gherardi G, Imperi M, von Hunolstein C, Baldassarri L, Pataracchia M, et al. Association of group A streptococcal emm types with virulence traits and macrolide-resistance genes is independent of the source of isolation. *Journal of medical microbiology*. 2005;54(10):913-7.
50. DeVecchio A, Maley M, Currie BJ, Sriprakash KS. NAD-glycohydrolase production and speA and speC distribution in group A streptococcus (GAS) isolates do not correlate with severe GAS diseases in the Australian population. *Journal of clinical microbiology*. 2002;40(7):2642-4.
51. Haukness HA, Tanz RR, Thomson Jr RB, Pierry DK, Kaplan EL, Beall B, et al. The heterogeneity of endemic community pediatric group a streptococcal pharyngeal

- isolates and their relationship to invasive isolates. *The Journal of infectious diseases*. 2002;185(7):915-20.
52. Mylvaganam H, Bjorvatn B, Osland A. Distribution and sequence variations of selected virulence genes among group A streptococcal isolates from western Norway. *Apmis*. 2000;108(11):771-8.
  53. Nandi S, Chakraborti A, Bakshi D, Rani A, Kumar R, Ganguly N. Association of pyrogenic exotoxin genes with pharyngitis and rheumatic fever/rheumatic heart disease among Indian isolates of *Streptococcus pyogenes*. *Letters in applied microbiology*. 2002;35(3):237-41.
  54. Tyler S, Johnson W, Huang J, Ashton F, Wang G, Low D, et al. Streptococcal erythrogenic toxin genes: detection by polymerase chain reaction and association with disease in strains isolated in Canada from 1940 to 1991. *Journal of clinical microbiology*. 1992;30(12):3127-31.
  55. Hsueh P-R, Wu J-J, Tsai P-J, Liu J-W, Chuang Y-C, Luh K-T. Invasive group A streptococcal disease in Taiwan is not associated with the presence of streptococcal pyrogenic exotoxin genes. *Clinical infectious diseases*. 1998;26(3):584-9.
  56. Schmitz F-J, Beyer A, Charpentier E, Normark BH, Schade M, Fluit AC, et al. Toxin-gene profile heterogeneity among endemic invasive European group A streptococcal isolates. *The Journal of infectious diseases*. 2003;188(10):1578-86.
  57. Lintges M, van der Linden M, Hilgers R-D, Arlt S, Al-Lahham A, Reinert RR, et al. Superantigen genes are more important than the emm type for the invasiveness of group A *Streptococcus* infection. *The Journal of infectious diseases*. 2010;202(1):20-8.
  58. Plainvert C, Dinis M, Ravins M, Hanski E, Touak G, Dmytruk N, et al. Molecular epidemiology of sil locus in clinical *Streptococcus pyogenes* strains. *Journal of clinical microbiology*. 2014;52(6):2003-10.
